# Supplementary material for: Predicting the probability of death using proteomics
Source: PubMed Central journal article supplement (PMC8213855; doi:10.1038/s42003-021-02289-6), 2021-06-18
Supplement: 42003_2021_2289_MOESM2_ESM.pdf [file 42003_2021_2289_MOESM2_ESM.pdf]

## Supplementary Tables

Supplementary Table 1: Number of proteins chosen by the Boruta method and the L1 penalized logistic regression models for death within 1,2,...,15, and the overlap between years.

| <b>All participants</b>           |                                                            |                                   |                                               |                                                           |                                   |                                               |
|-----------------------------------|------------------------------------------------------------|-----------------------------------|-----------------------------------------------|-----------------------------------------------------------|-----------------------------------|-----------------------------------------------|
| <b>Death within years</b>         | <b># protein measurements selected by prediction model</b> | <b>Overlap with previous year</b> | <b>Cumulative overlap with previous years</b> | <b># relevant protein measurements selected by Boruta</b> | <b>Overlap with previous year</b> | <b>Cumulative overlap with previous years</b> |
| 1                                 | 81                                                         |                                   |                                               | 209                                                       |                                   |                                               |
| 2                                 | 98                                                         | 39                                | 39                                            | 236                                                       | 178                               | 178                                           |
| 3                                 | 87                                                         | 51                                | 23                                            | 236                                                       | 207                               | 163                                           |
| 4                                 | 94                                                         | 59                                | 17                                            | 235                                                       | 199                               | 146                                           |
| 5                                 | 117                                                        | 72                                | 17                                            | 249                                                       | 210                               | 141                                           |
| 6                                 | 136                                                        | 86                                | 17                                            | 263                                                       | 228                               | 139                                           |
| 7                                 | 156                                                        | 98                                | 16                                            | 390                                                       | 259                               | 139                                           |
| 8                                 | 193                                                        | 134                               | 16                                            | 386                                                       | 362                               | 139                                           |
| 9                                 | 207                                                        | 149                               | 14                                            | 407                                                       | 365                               | 137                                           |
| 10                                | 199                                                        | 151                               | 13                                            | 407                                                       | 387                               | 137                                           |
| 11                                | 207                                                        | 158                               | 12                                            | 418                                                       | 392                               | 137                                           |
| 12                                | 212                                                        | 164                               | 11                                            | 423                                                       | 397                               | 137                                           |
| 13                                | 219                                                        | 171                               | 11                                            | 439                                                       | 402                               | 135                                           |
| 14                                | 190                                                        | 151                               | 10                                            | 471                                                       | 426                               | 135                                           |
| 15                                | 192                                                        | 150                               | 10                                            | 454                                                       | 433                               | 135                                           |
| <b>Participants older than 60</b> |                                                            |                                   |                                               |                                                           |                                   |                                               |
| 1                                 | 56                                                         |                                   |                                               | 177                                                       |                                   |                                               |
| 2                                 | 75                                                         | 26                                | 26                                            | 183                                                       | 133                               | 133                                           |
| 3                                 | 75                                                         | 48                                | 19                                            | 185                                                       | 151                               | 115                                           |
| 4                                 | 88                                                         | 55                                | 14                                            | 182                                                       | 158                               | 102                                           |
| 5                                 | 71                                                         | 57                                | 13                                            | 185                                                       | 158                               | 95                                            |
| 6                                 | 93                                                         | 58                                | 11                                            | 180                                                       | 157                               | 92                                            |
| 7                                 | 116                                                        | 75                                | 11                                            | 215                                                       | 167                               | 91                                            |
| 8                                 | 114                                                        | 85                                | 11                                            | 195                                                       | 183                               | 87                                            |
| 9                                 | 106                                                        | 82                                | 11                                            | 206                                                       | 181                               | 85                                            |
| 10                                | 119                                                        | 85                                | 10                                            | 214                                                       | 185                               | 85                                            |
| 11                                | 115                                                        | 88                                | 8                                             | 213                                                       | 185                               | 83                                            |
| 12                                | 116                                                        | 86                                | 7                                             | 212                                                       | 187                               | 81                                            |
| 13                                | 116                                                        | 87                                | 7                                             | 220                                                       | 193                               | 80                                            |
| 14                                | 124                                                        | 90                                | 7                                             | 220                                                       | 196                               | 78                                            |
| 15                                | 115                                                        | 92                                | 7                                             | 229                                                       | 202                               | 78                                            |

Supplementary Table 2: Discrimination and reclassification performance of different models for two-, five- and ten-year prediction

| Model                             | AUC (95% confidence interval) | AUC difference from baseline (p-val) | IDI vs baseline (95% confidence interval) |
|-----------------------------------|-------------------------------|--------------------------------------|-------------------------------------------|
| <b>All participants</b>           |                               |                                      |                                           |
| <b>Death within 2-years</b>       |                               |                                      |                                           |
| Age+sex                           | 0.842(0.819-0.865)            | -0.051(4.6E-08)                      | -0.063(-0.077--0.048)                     |
| Baseline                          | 0.894(0.878-0.910)            | -                                    | -                                         |
| Age+sex+GDF15                     | 0.912(0.897-0.927)            | 0.018(2.9E-02)                       | 0.067(0.040-0.097)                        |
| Age+sex+protein                   | 0.932(0.919-0.945)            | 0.039(9.7E-07)                       | 0.167(0.128-0.206)                        |
| <b>Death within 5-years</b>       |                               |                                      |                                           |
| Age+sex                           | 0.852(0.838-0.865)            | -0.033(2.4E-11)                      | -0.058(-0.069--0.047)                     |
| Baseline                          | 0.885(0.872-0.896)            | -                                    | -                                         |
| Age+sex+GDF15                     | 0.893(0.882-0.905)            | 0.008(8.7E-02)                       | 0.038(0.022-0.055)                        |
| Age+sex+protein                   | 0.915(0.903-0.925)            | 0.030(1.4E-09)                       | 0.115(0.095-0.137)                        |
| <b>Death within 10-years</b>      |                               |                                      |                                           |
| Age+sex                           | 0.883(0.874-0.892)            | -0.018(4.7E-12)                      | -0.043(-0.050--0.036)                     |
| Baseline                          | 0.901(0.893-0.909)            | -                                    | -                                         |
| Age+sex+GDF15                     | 0.905(0.897-0.913)            | 0.004(1.9E-01)                       | 0.015(0.005-0.025)                        |
| Age+sex+protein                   | 0.923(0.915-0.931)            | 0.022(3.1E-13)                       | 0.077(0.065-0.090)                        |
| <b>Participants older than 60</b> |                               |                                      |                                           |
| <b>Death within 2-years</b>       |                               |                                      |                                           |
| Age+sex                           | 0.737(0.702-0.772)            | -0.074(5.3E-07)                      | -0.067(-0.084--0.052)                     |
| Baseline                          | 0.811(0.784-0.837)            | -                                    | -                                         |
| Age+sex+GDF15                     | 0.841(0.816-0.868)            | 0.030(4.4E-02)                       | 0.056(0.031-0.086)                        |
| Age+sex+protein                   | 0.874(0.850-0.896)            | 0.062(5.7E-06)                       | 0.136(0.102-0.172)                        |
| <b>Death within 5-years</b>       |                               |                                      |                                           |
| Age+sex                           | 0.750(0.727-0.772)            | -0.050(4.3E-10)                      | -0.061(-0.072--0.049)                     |
| Baseline                          | 0.801(0.781-0.818)            | -                                    | -                                         |
| Age+sex+GDF15                     | 0.820(0.799-0.839)            | 0.019(3.4E-02)                       | 0.040(0.022-0.058)                        |
| Age+sex+protein                   | 0.853(0.835-0.870)            | 0.053(4.5E-09)                       | 0.113(0.092-0.136)                        |
| <b>Death within 10-years</b>      |                               |                                      |                                           |
| Age+sex                           | 0.774(0.757-0.791)            | -0.032(3.8E-10)                      | -0.049(-0.058--0.041)                     |
| Baseline                          | 0.806(0.789-0.822)            | -                                    | -                                         |
| Age+sex+GDF15                     | 0.819(0.803-0.834)            | 0.013(2.8E-02)                       | 0.022(0.011-0.033)                        |
| Age+sex+protein                   | 0.851(0.837-0.864)            | 0.045(9.0E-13)                       | 0.086(0.072-0.100)                        |

Supplementary Table 3: Discrimination performance with and without the baseline variables included in the models.

|                              | All participants                 |                        |                              | Participants older than 60       |                        |                              |
|------------------------------|----------------------------------|------------------------|------------------------------|----------------------------------|------------------------|------------------------------|
|                              | AUC<br>(95% confidence interval) |                        | AUC<br>difference<br>(p-val) | AUC<br>(95% confidence interval) |                        | AUC<br>difference<br>(p-val) |
| <b>Death within 2-years</b>  | Age+sex+                         | Baseline+              |                              | Age+sex+                         | Baseline+              |                              |
| GDF15                        | 0.912<br>(0.897-0.927)           | 0.929<br>(0.916-0.942) | 0.017<br>(4.8E-04)           | 0.841<br>(0.816-0.868)           | 0.868<br>(0.847-0.893) | 0.027<br>(2.2E-03)           |
| Protein                      | 0.932<br>(0.919-0.945)           | 0.938<br>(0.926-0.951) | 0.006<br>(1.9E-02)           | 0.874<br>(0.850-0.896)           | 0.885<br>(0.864-0.908) | 0.011<br>(1.4E-02)           |
| <b>Death within 5-years</b>  | Age+sex+                         | Baseline+              |                              | Age+sex+                         | Baseline+              |                              |
| GDF15                        | 0.893<br>(0.882-0.905)           | 0.907<br>(0.896-0.918) | 0.014<br>(5.0E-06)           | 0.820<br>(0.799-0.839)           | 0.839<br>(0.820-0.857) | 0.020<br>(4.8E-05)           |
| Protein                      | 0.915<br>(0.903-0.925)           | 0.921<br>(0.910-0.930) | 0.006<br>(4.4E-04)           | 0.853<br>(0.835-0.870)           | 0.861<br>(0.844-0.877) | 0.008<br>(2.3E-03)           |
| <b>Death within 10-years</b> | Age+sex+                         | Baseline+              |                              | Age+sex+                         | Baseline+              |                              |
| GDF15                        | 0.905<br>(0.897-0.913)           | 0.913<br>(0.906-0.921) | 0.008<br>(4.2E-06)           | 0.819<br>(0.803-0.834)           | 0.830<br>(0.815-0.846) | 0.012<br>(3.5E-04)           |
| Protein                      | 0.923<br>(0.915-0.931)           | 0.926<br>(0.918-0.933) | 0.003<br>(8.3E-03)           | 0.851<br>(0.837-0.864)           | 0.856<br>(0.842-0.869) | 0.005<br>(9.7E-03)           |

Supplementary Table 4: Top ten single protein associations with all-cause mortality for different time to death.

| Proteins                                                                           | Gene Name | Beta  | P-value   |
|------------------------------------------------------------------------------------|-----------|-------|-----------|
| <b>Death within 2 years</b>                                                        |           |       |           |
| Growth/differentiation factor 15                                                   | GDF15     | 1.35  | 2.75E-137 |
| Thrombospondin-2                                                                   | THBS2     | 0.76  | 8.33E-99  |
| Alpha-1-antichymotrypsin complex                                                   | SERPINA3  | 0.79  | 5.60E-91  |
| Retinoblastoma-like protein 2                                                      | RBL2      | 0.84  | 5.97E-87  |
| WAP four-disulfide core domain protein 2                                           | WFDC2     | 0.92  | 4.62E-85  |
| Spondin-2                                                                          | SPON2     | 0.92  | 1.41E-82  |
| Serum amyloid A-1 protein                                                          | SAA1      | 0.67  | 8.38E-82  |
| Serum amyloid A-2 protein                                                          | SAA2      | 0.54  | 2.26E-80  |
| C5a anaphylatoxin                                                                  | C5        | 0.93  | 1.78E-78  |
| Anthrax toxin receptor 2                                                           | ANTXR2    | -0.67 | 8.11E-76  |
| <b>Death within 5 years</b>                                                        |           |       |           |
| Growth/differentiation factor 15                                                   | GDF15     | 1.20  | 1.91E-167 |
| WAP four-disulfide core domain protein 2                                           | WFDC2     | 0.82  | 2.05E-111 |
| Thrombospondin-2                                                                   | THBS2     | 0.62  | 9.07E-100 |
| Anthrax toxin receptor 2                                                           | ANTXR2    | -0.56 | 4.62E-88  |
| Retinoblastoma-like protein 2                                                      | RBL2      | 0.65  | 9.23E-88  |
| Alpha-1-antichymotrypsin complex                                                   | SERPINA3  | 0.61  | 1.51E-86  |
| Tumor necrosis factor receptor superfamily member 1A                               | TNFRSF1A  | 0.64  | 9.82E-85  |
| Angiopoietin-2                                                                     | ANGPT2    | 0.64  | 1.11E-82  |
| Macrophage metalloelastase                                                         | MMP12     | 0.66  | 3.94E-81  |
| Spondin-2                                                                          | SPON2     | 0.67  | 1.40E-80  |
| <b>Death within 10 years</b>                                                       |           |       |           |
| Growth/differentiation factor 15                                                   | GDF15     | 1.04  | 1.45E-155 |
| WAP four-disulfide core domain protein 2                                           | WFDC2     | 0.76  | 1.01E-116 |
| Macrophage metalloelastase                                                         | MMP12     | 0.62  | 1.22E-86  |
| Thrombospondin-2                                                                   | THBS2     | 0.50  | 6.10E-81  |
| Angiopoietin-2                                                                     | ANGPT2    | 0.55  | 9.47E-79  |
| Retinoblastoma-like protein 2                                                      | RBL2      | 0.54  | 1.22E-78  |
| Tumor necrosis factor receptor superfamily member 1A                               | TNFRSF1A  | 0.56  | 4.49E-77  |
| Alpha-1-antichymotrypsin complex                                                   | SERPINA3  | 0.50  | 3.89E-75  |
| Anthrax toxin receptor 2                                                           | ANTXR2    | -0.45 | 2.93E-73  |
| Transgelin                                                                         | TAGLN     | 0.65  | 8.46E-67  |
| <b>Death within 15 years</b>                                                       |           |       |           |
| Growth/differentiation factor 15                                                   | GDF15     | 1.03  | 3.38E-154 |
| WAP four-disulfide core domain protein 2                                           | WFDC2     | 0.74  | 3.76E-114 |
| Macrophage metalloelastase                                                         | MMP12     | 0.62  | 7.05E-85  |
| Angiopoietin-2                                                                     | ANGPT2    | 0.54  | 6.20E-79  |
| Thrombospondin-2                                                                   | THBS2     | 0.46  | 6.69E-69  |
| Retinoblastoma-like protein 2                                                      | RBL2      | 0.48  | 3.58E-67  |
| Anthrax toxin receptor 2                                                           | ANTXR2    | -0.42 | 3.42E-65  |
| Tumor necrosis factor receptor superfamily member 1A                               | TNFRSF1A  | 0.50  | 3.29E-63  |
| Sushi, von Willebrand factor type A, EGF and pentraxin domain-containing protein 1 | SVEP1     | 0.51  | 1.64E-60  |
| C5a anaphylatoxin                                                                  | C5        | 0.44  | 2.43E-58  |

Supplementary Table 5: Top single protein associations with different causes of death within five years.

| Protein                                                        | Gene Name | Beta  | P-value   |
|----------------------------------------------------------------|-----------|-------|-----------|
| <b>Neoplasms</b>                                               |           |       |           |
| Growth/differentiation factor 15                               | GDF15     | 1.42  | 3.83E-140 |
| Thrombospondin-2                                               | THBS2     | 0.77  | 2.02E-90  |
| Retinoblastoma-like protein 2                                  | RBL2      | 0.85  | 2.29E-88  |
| WAP four-disulfide core domain protein 2                       | WFDC2     | 0.88  | 6.96E-83  |
| Alpha-1-antichymotrypsin complex                               | SERPINA3  | 0.75  | 5.92E-77  |
| <b>Nervous system</b>                                          |           |       |           |
| Hematopoietic prostaglandin D synthase                         | HPGDS     | -0.66 | 9.24E-08  |
| Anthrax toxin receptor 2                                       | ANTXR2    | -0.60 | 1.41E-07  |
| Disintegrin and metalloproteinase domain-containing protein 22 | ADAM22    | -0.99 | 5.86E-07  |
| Growth hormone receptor                                        | GHR       | -0.72 | 9.83E-07  |
| Insulin-like growth factor-binding protein 2                   | IGFBP2    | 0.86  | 2.55E-06  |
| <b>Circulatory system</b>                                      |           |       |           |
| Growth/differentiation factor 15                               | GDF15     | 1.01  | 1.03E-42  |
| WAP four-disulfide core domain protein 2                       | WFDC2     | 0.85  | 8.93E-42  |
| N-terminal pro-BNP                                             | NPPB      | 0.66  | 2.73E-34  |
| Transmembrane emp24 domain-containing protein 10               | TMED10    | 0.53  | 5.62E-32  |
| Ribonuclease pancreatic                                        | RNASE1    | 0.57  | 6.63E-32  |
| <b>Respiratory system</b>                                      |           |       |           |
| WAP four-disulfide core domain protein 2                       | WFDC2     | 1.12  | 2.96E-21  |
| Growth/differentiation factor 15                               | GDF15     | 1.12  | 1.32E-16  |
| Troponin T, cardiac muscle                                     | TNNT2     | 0.62  | 1.02E-14  |
| Cartilage intermediate layer protein 2                         | CILP2     | -0.82 | 4.48E-13  |
| Hematopoietic prostaglandin D synthase                         | HPGDS     | -0.72 | 7.09E-13  |
| <b>Other</b>                                                   |           |       |           |
| Growth/differentiation factor 15                               | GDF15     | 1.13  | 3.05E-22  |
| Tyrosine-protein kinase transmembrane receptor ROR2            | ROR2      | 0.53  | 6.28E-19  |
| WAP four-disulfide core domain protein 2                       | WFDC2     | 0.85  | 1.35E-18  |
| Beta-2-microglobulin                                           | B2M       | 0.50  | 1.77E-18  |
| Tumor necrosis factor receptor superfamily member 1A           | TNFRSF1A  | 0.66  | 1.22E-17  |

Supplementary Table 6: Order of proteins selected into an all-cause mortality prediction model on top of age and sex.

| <b>Death within 5 years</b>                                                        | <b>Gene Name</b> | <b>Forward selection order</b> | <b>L1 bootstrap order</b> | <b>Included in 1000 bootstraps</b> |
|------------------------------------------------------------------------------------|------------------|--------------------------------|---------------------------|------------------------------------|
| Growth/differentiation factor 15                                                   | GDF15            | 1                              | 6                         | 997                                |
| Anthrax toxin receptor 2                                                           | ANTXR2           | 2                              | 81                        | 801                                |
| Insulin-like growth factor-binding protein 2                                       | IGFBP2           | 3                              | 161                       | 656                                |
| Serum amyloid A-1 protein                                                          | SAA1             | 4                              | 12                        | 990                                |
| Insulin-like growth factor-binding protein 6                                       | IGFBP6           | 5                              | 7                         | 997                                |
| Spondin-1                                                                          | SPON1            | 6                              | 182                       | 624                                |
| Tetranectin                                                                        | CLEC3B           | 7                              | 1                         | 1000                               |
| dCTP pyrophosphatase 1                                                             | DCTPP1           | 8                              | 2                         | 999                                |
| Transgelin                                                                         | TAGLN            | 9                              | 31                        | 945                                |
| Tumor necrosis factor receptor superfamily member EDAR                             | EDAR             | 10                             | 49                        | 902                                |
| Alpha-1-antichymotrypsin complex                                                   | SERPINA3         | 11                             | 21                        | 976                                |
| Erythropoietin                                                                     | EPO              | 12                             | 5                         | 998                                |
| Hematopoietic prostaglandin D synthase                                             | HPGDS            | 13                             | 8                         | 995                                |
| Macrophage metalloelastase                                                         | MMP12            | 14                             | 4                         | 999                                |
| Complement component C7                                                            | C7               | 15                             | 54                        | 874                                |
| L-Selectin                                                                         | SELL             | 16                             | 25                        | 969                                |
| Netrin receptor UNC5B                                                              | UNC5B            | 17                             | 16                        | 985                                |
| Brorin                                                                             | VWC2             | 18                             | 34                        | 941                                |
| WAP four-disulfide core domain protein 2                                           | WFDC2            | 19                             | 24                        | 970                                |
| Serum amyloid A-2 protein                                                          | SAA2             | 20                             | 167                       | 650                                |
| <b>Death within 10 years</b>                                                       |                  |                                |                           |                                    |
| Growth/differentiation factor 15                                                   | GDF15            | 1                              | 25                        | 980                                |
| Anthrax toxin receptor 2                                                           | ANTXR2           | 2                              | 79                        | 865                                |
| Insulin-like growth factor-binding protein 2                                       | IGFBP2           | 3                              | 302                       | 538                                |
| Alpha-1-antichymotrypsin complex                                                   | SERPINA3         | 4                              | 19                        | 988                                |
| Epidermal growth factor receptor                                                   | EGFR             | 5                              | 14                        | 996                                |
| Sushi, von Willebrand factor type A, EGF and pentraxin domain-containing protein 1 | SVEP1            | 6                              | 350                       | 449                                |
| Tetranectin                                                                        | CLEC3B           | 7                              | 84                        | 857                                |
| Spondin-1                                                                          | SPON1            | 8                              | 229                       | 622                                |
| Serine protease inhibitor Kazal-type 5                                             | SPINK5           | 9                              | 9                         | 998                                |
| WAP four-disulfide core domain protein 2                                           | WFDC2            | 10                             | 5                         | 999                                |
| Immunoglobulin superfamily member 3                                                | IGSF3            | 11                             | 11                        | 997                                |
| Fc receptor-like protein 1                                                         | FCRL1            | 12                             | 22                        | 985                                |
| Pleiotrophin                                                                       | PTN              | 13                             | 34                        | 962                                |
| RGM domain family member B                                                         | RGMB             | 14                             | 17                        | 991                                |
| Ephrin type-B receptor 2                                                           | EPHB2            | 15                             | 8                         | 999                                |
| Transgelin                                                                         | TAGLN            | 16                             | 66                        | 888                                |
| Triggering receptor expressed on myeloid cells 1                                   | TREM1            | 17                             | 77                        | 867                                |
| Elafin                                                                             | PI3              | 18                             | 3                         | 1000                               |
| WNT1-inducible-signaling pathway protein 2                                         | WISP2            | 19                             | 18                        | 990                                |
| N-terminal pro-BNP                                                                 | NPPB             | 20                             | 24                        | 983                                |

Supplementary Table 7: Associations of five-year mortality risk predicted by the protein model and corrected for age and sex with binary risk-factors in the dHS and VSP2 datasets.

| Phenotype                    | All participants   |                 |                              |          | Participants older than 60 |                 |                              |         |
|------------------------------|--------------------|-----------------|------------------------------|----------|----------------------------|-----------------|------------------------------|---------|
|                              | Number of controls | Number of cases | Increase in mean risk in sd. | P-value  | Number of controls         | Number of cases | Increase in mean risk in sd. | P-value |
| <b>Diabetes</b>              | 14917              | 695             | 0.89                         | 2.7E-118 | 5819                       | 476             | 0.82                         | 1.2E-67 |
| <b>MI</b>                    | 14969              | 643             | 0.62                         | 6.5E-54  | 5002                       | 1293            | 0.36                         | 1.7E-30 |
| <b>CAD</b>                   | 14098              | 1514            | 0.40                         | 4.7E-50  | 5779                       | 516             | 0.48                         | 4.9E-26 |
| <b>Cancer</b>                | 14401              | 1211            | 0.33                         | 2.7E-28  | 5376                       | 919             | 0.28                         | 9.7E-15 |
| <b>Smoker</b>                | 14147              | 1465            | 0.33                         | 5.1E-34  | 5750                       | 545             | 0.40                         | 8.5E-19 |
| <b>Clonal haematopoiesis</b> | 7518               | 587             | 0.09                         | 2.8E-02  | 3022                       | 474             | 0.04                         | 3.3E-01 |

## Supplementary Figures

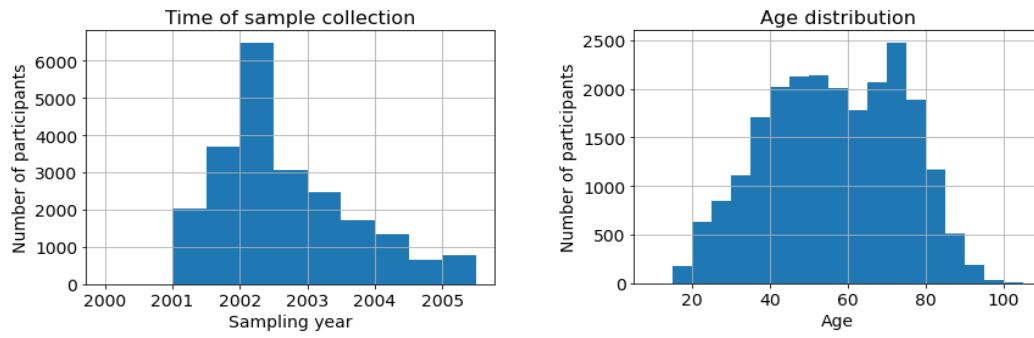

Supplementary Figure 1: Year of plasma sample collection and age distribution in the ICP + VSP1 dataset.

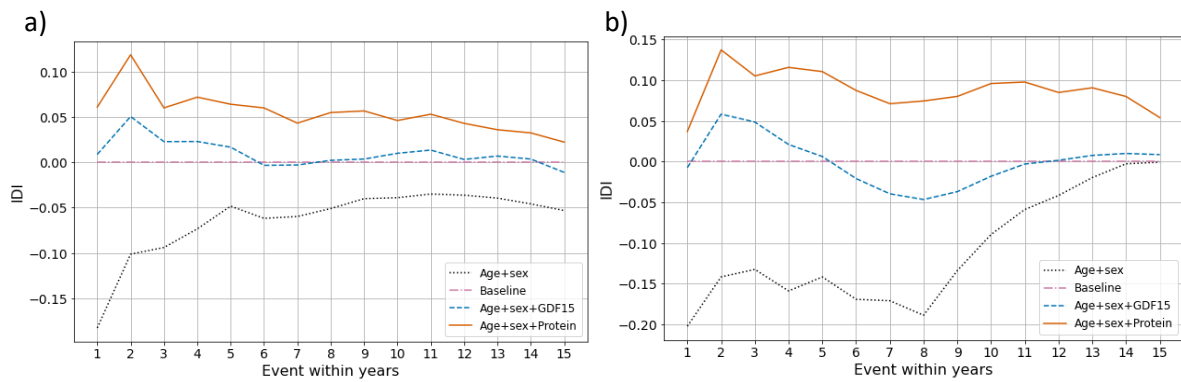

Supplementary Figure 2: IDIs over the baseline at different time points. a) All participants b) Participants older than 60.

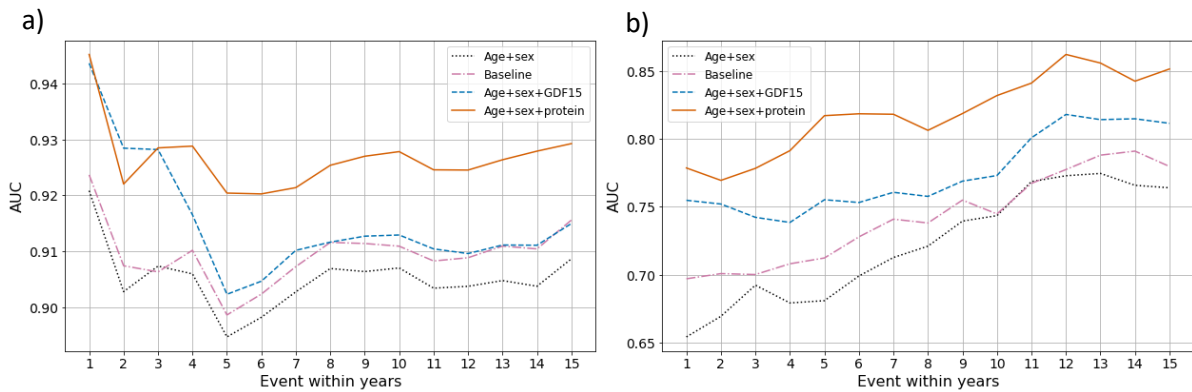

Supplementary Figure 3: AUC at different time points in subsets of the test data. a) All participants not diagnosed with major diseases (Cancer, history of MI, history of stroke, or CAD) at time of plasma collection, N=4,770, b) participants older than 80, N=564.



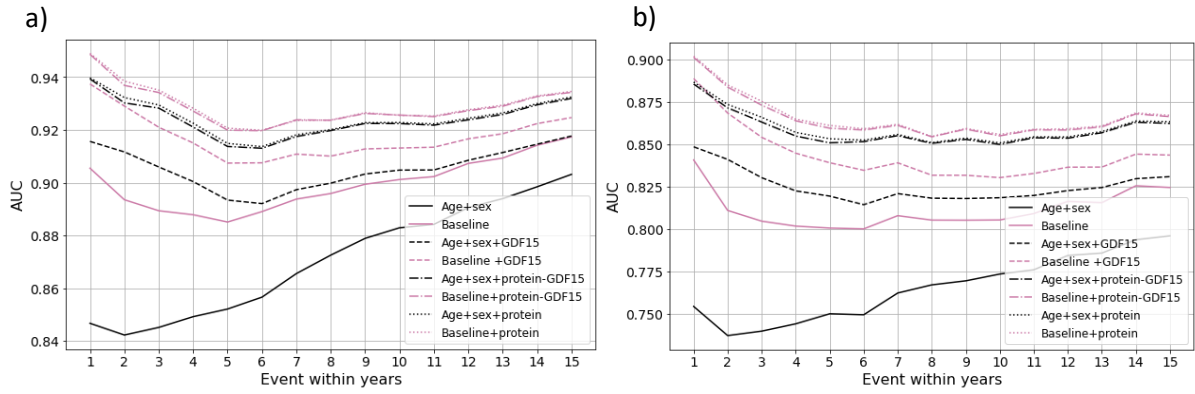

Supplementary Figure 4: AUC at different time points for models with and without baseline features and with and without GDF15. a) All participants, b) participants older than 60.

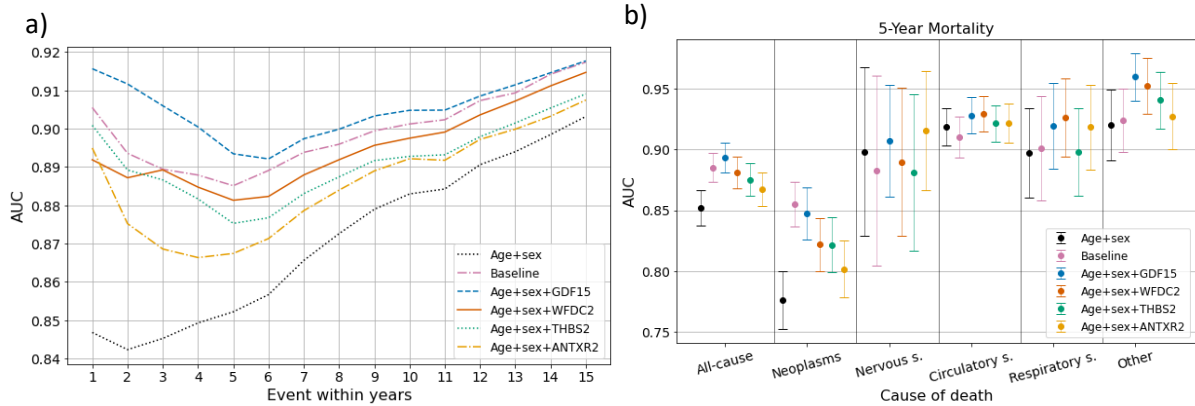

Supplementary Figure 5: AUC for models using single proteins. a) Prediction for different time points, b) five-year prediction for different causes of death, the error bars represent 95% confidence intervals.

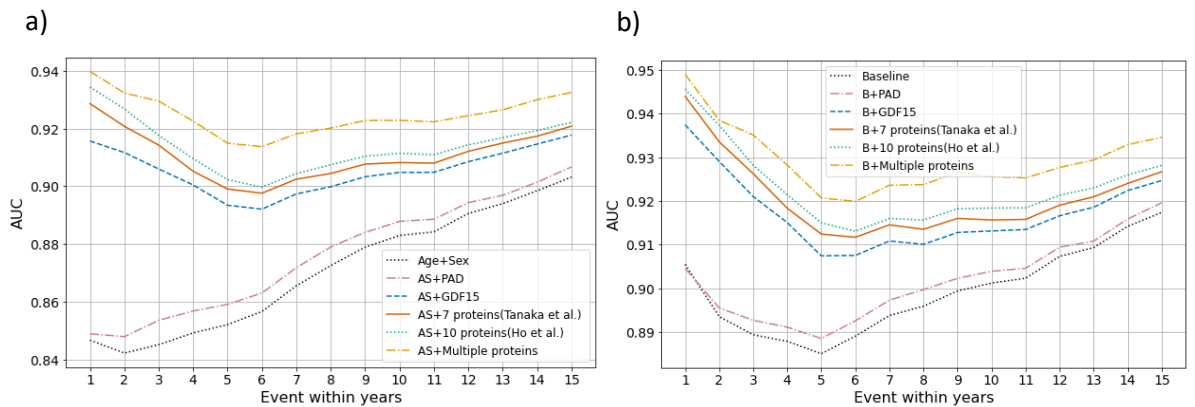

Supplementary Figure 6: AUC for protein models from other studies, at different time points, compared to our models. The figures compare our model which uses multiple proteins and different number of proteins for each time point, to models using combinations of proteins or protein derived PAD identified as good predictors in previous studies. a) Every model includes age and sex, b) every model includes the baseline.

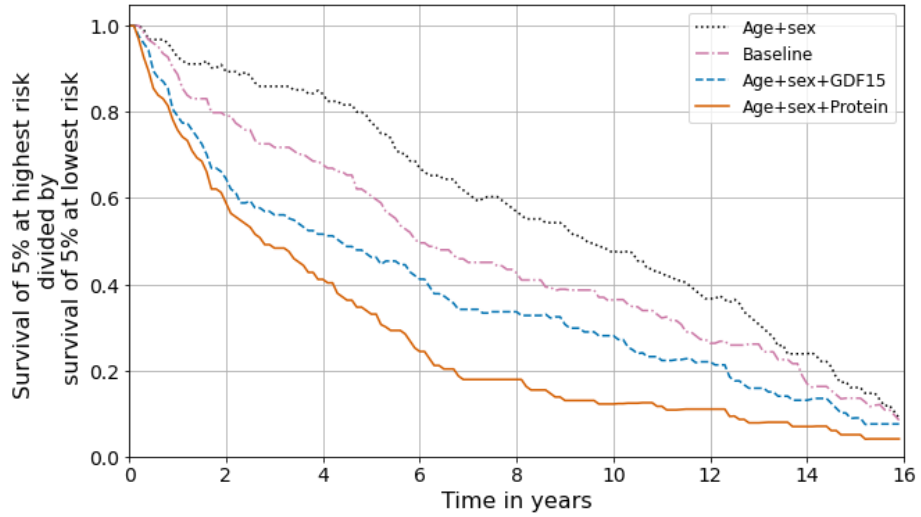

Supplementary Figure 7: Survival of 60-80 years old participants. The Kaplan-Meier survival for the 5% at highest ten-year risk divided by the 5% at the lowest ten-year risk.

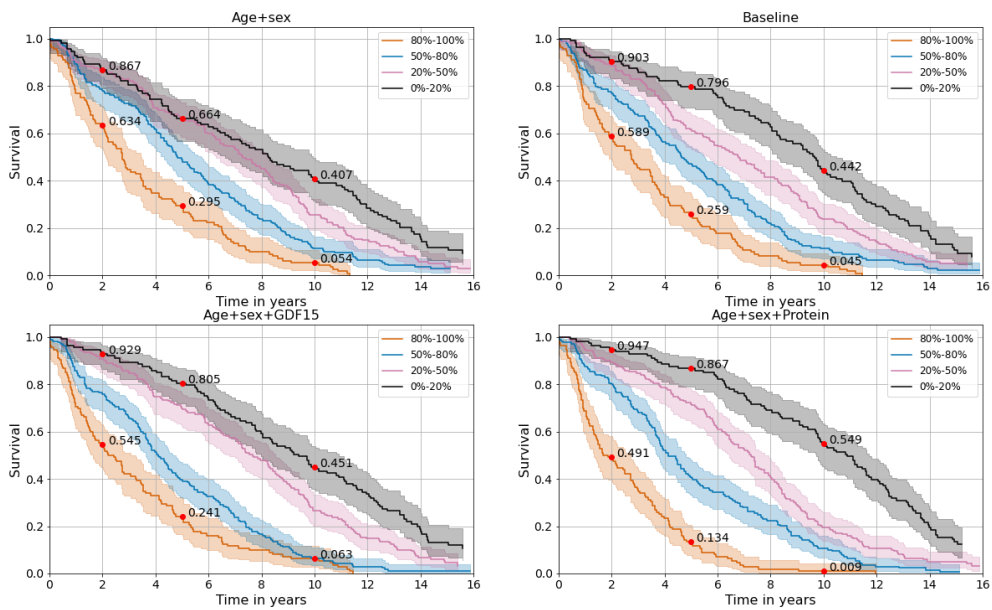

Supplementary Figure 8: Survival curves for participants 80 years old or older, N= 564, split by ten-year predicted risk quantiles. The coloured areas represent 95% confidence intervals.

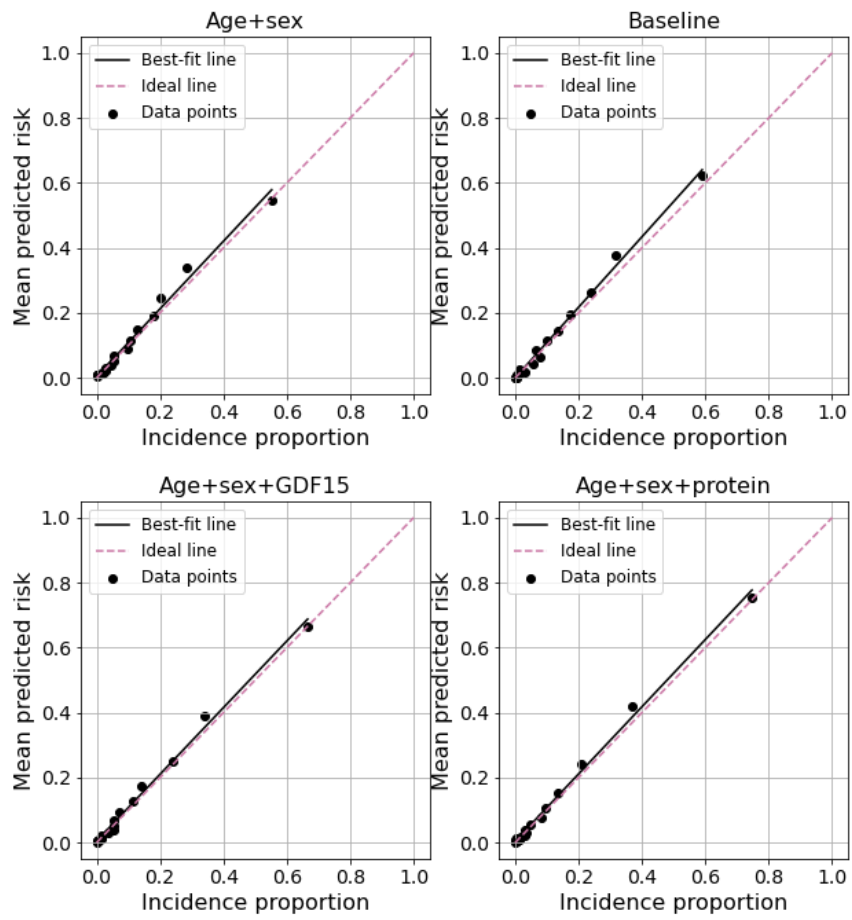

Supplementary Figure 9: Calibration of five-year mortality risk prediction models.

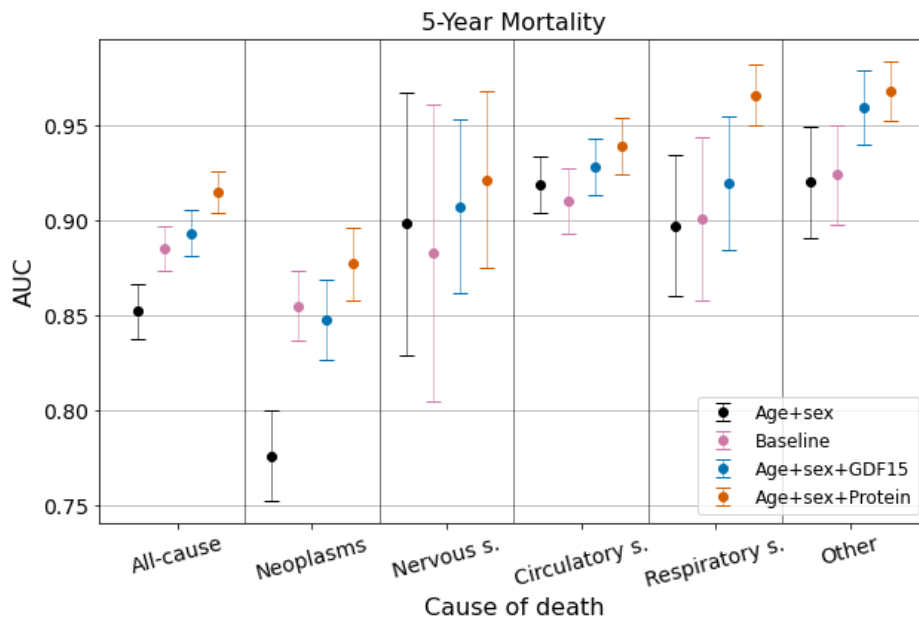

Supplementary Figure 10: AUCs for different causes of death within five years. The AUC is calculated for each cause of death vs. alive, excluding all other causes. The error bars represent 95% confidence intervals.

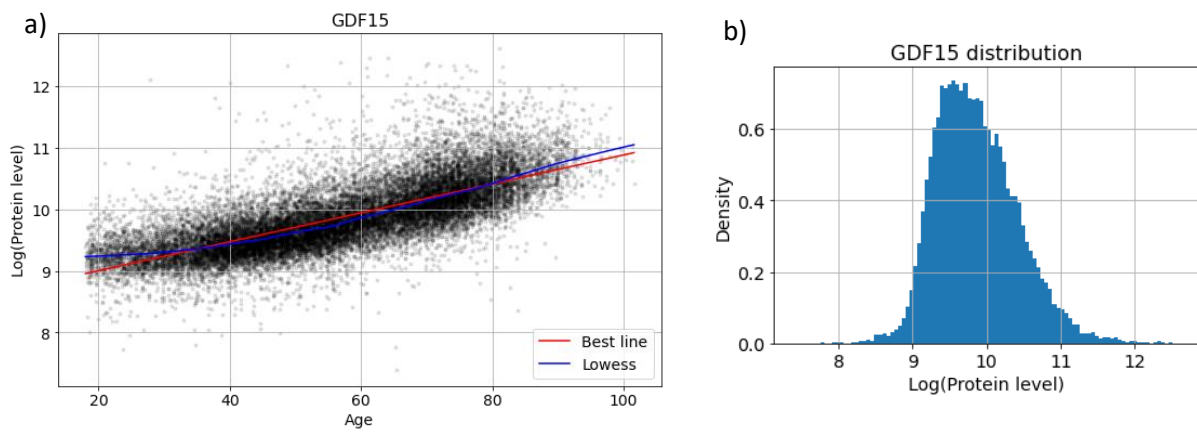

Supplementary Figure 11: GDF15 in the ICP+VSP1 dataset. a) Levels of GDF15 vs. age. The figure also shows the best straight line and a line fit with locally weighted scatterplot smoothing. b) The distribution of GDF levels.

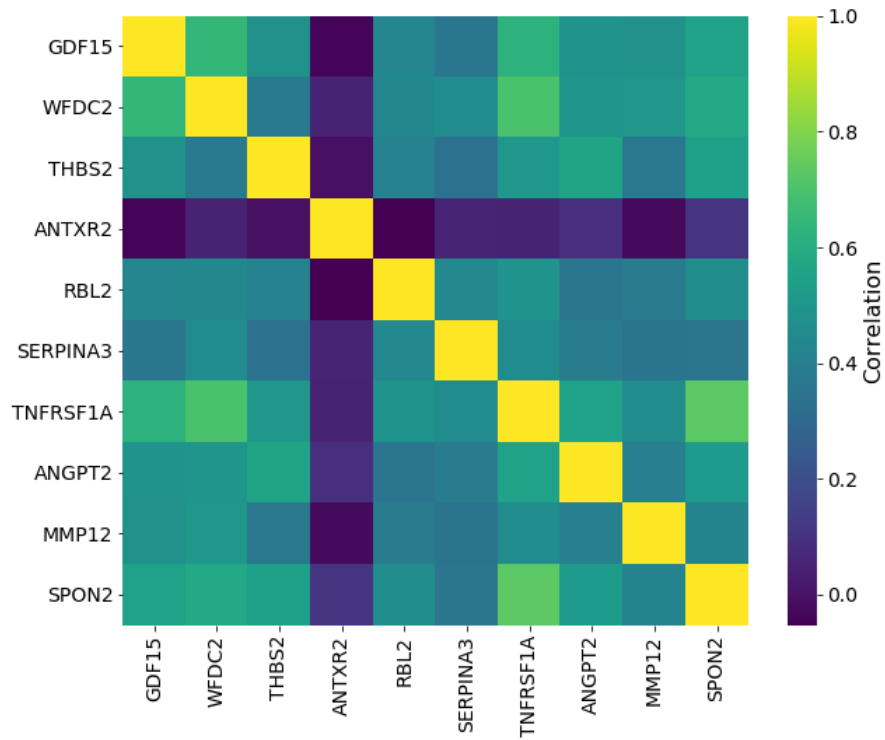

Supplementary Figure 12: Correlations between plasma protein levels for the top ten proteins associated with five-year mortality.

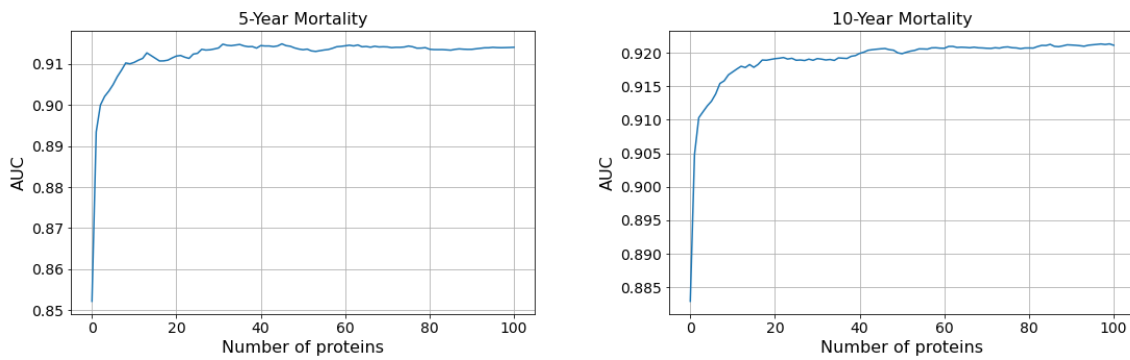

Supplementary Figure 13: AUC for models using age and sex and 0-100 proteins as selected by stepwise forward selection.

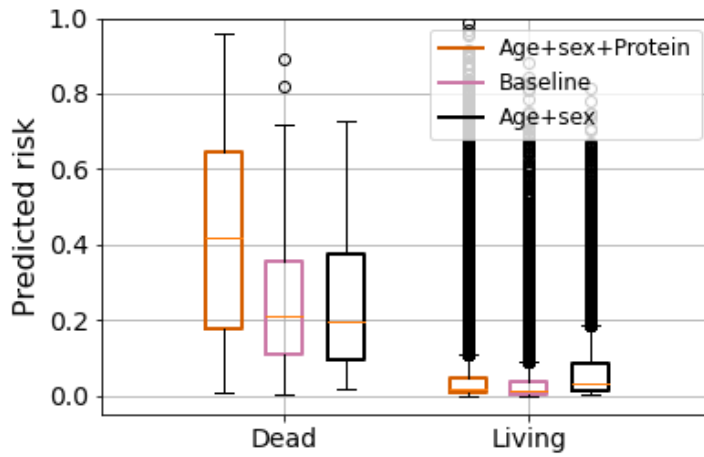

Supplementary Figure 14: Predicted five-year risk for participants in the dHS and VSP2 datasets. The yellow centre line represent the median, the box limits represent the upper and lower quartiles, the whiskers represent the 1.5x interquartile range, and the circles are data points outside the whisker range.

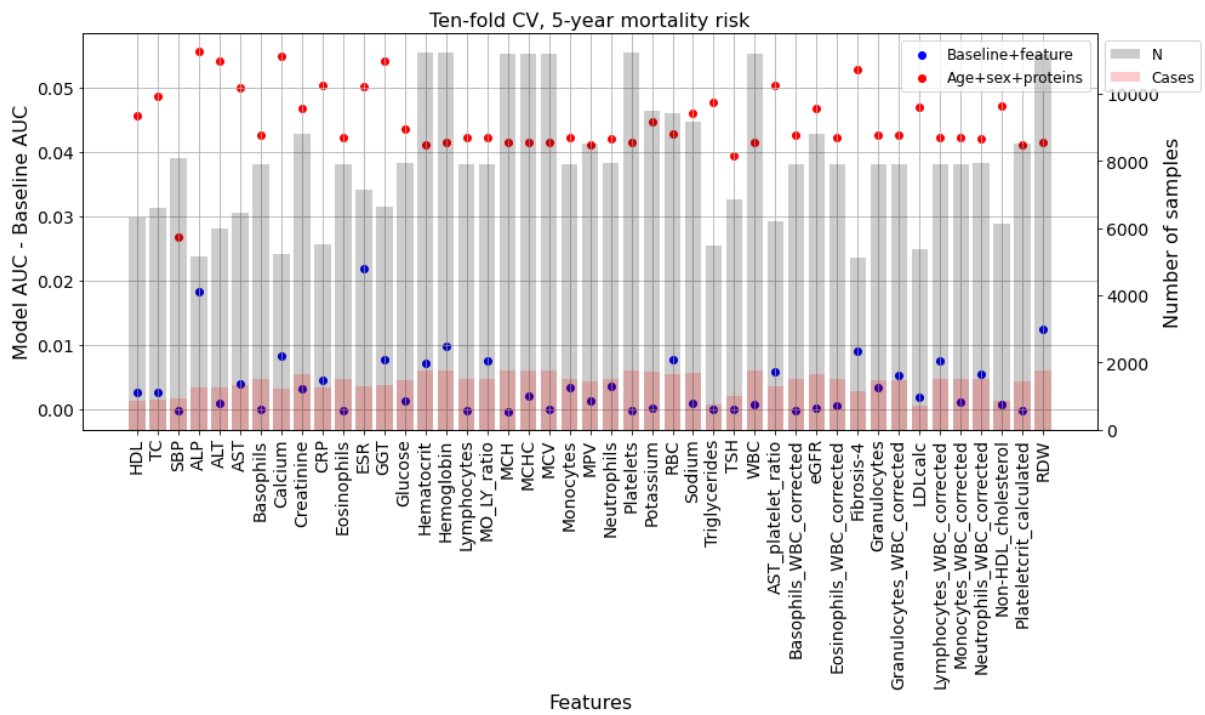

Supplementary Figure 15: Extra features in the baseline model. The blue dots show the increase of mean AUC from including the features on the x-axis in the baseline model. The bars show for how many participants the features are available. Since the AUC is heavily influenced by the dataset, the results for a protein model trained on the same data is also shown (red dots).

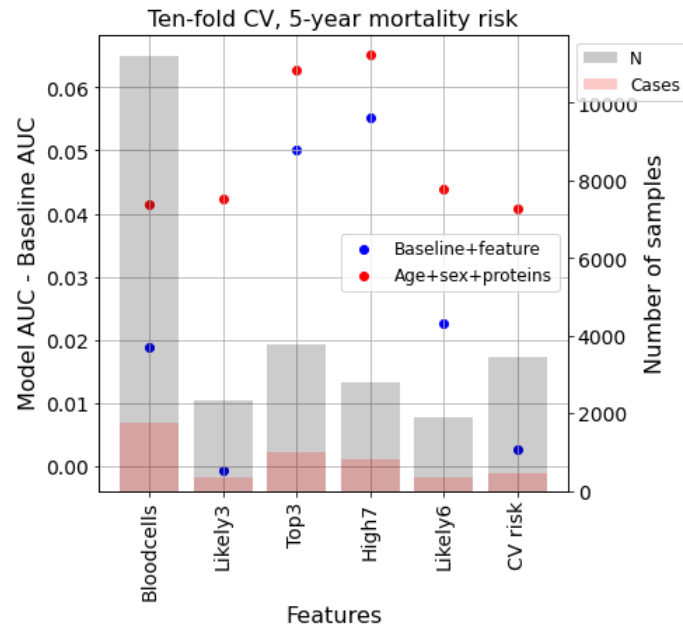

Supplementary Figure 16: Sets of extra features for the baseline model. The blue dots show the increase of mean AUC from including the set of features in the baseline model. The bars show for how many participants all the features in the set are available. Since the AUC is heavily influenced by the dataset, the results for a protein model trained on the same data is also shown (red dots). **Bloodcells**: Hematocrit, Hemoglobin, MCH, MCHC, Platelets, WBC, and RDW. **Likely3**: SBP, Glucose, and Triglycerides. **Top3**: ALP, ESR, and RDW. **High7**: ALP, ESR, RDW, Fibrosis-4, Hematocrit, Hemoglobin, and RBC. **Likely6**: SBP, Glucose, Triglycerides, HDL, TC, and Creatinine. **CV risk**: SBP, HDL, TC.

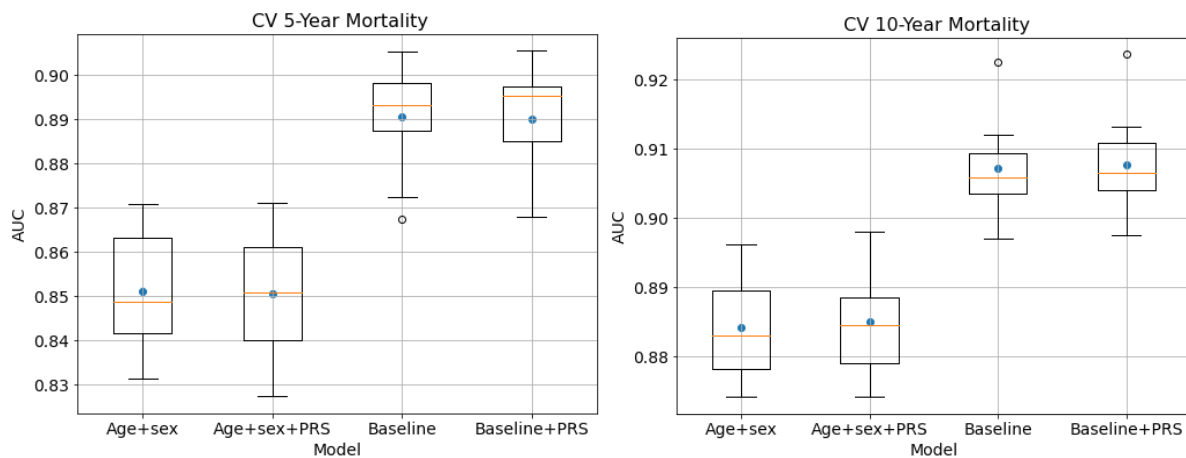

Supplementary Figure 17: Ten-fold CV AUC for models with and without PRS. The yellow centre line represents the median, the box limits represent the upper and lower quartiles, the whiskers represent the 1.5x interquartile range, the circles are data points outside the whisker range, and the blue dots represent the mean values.

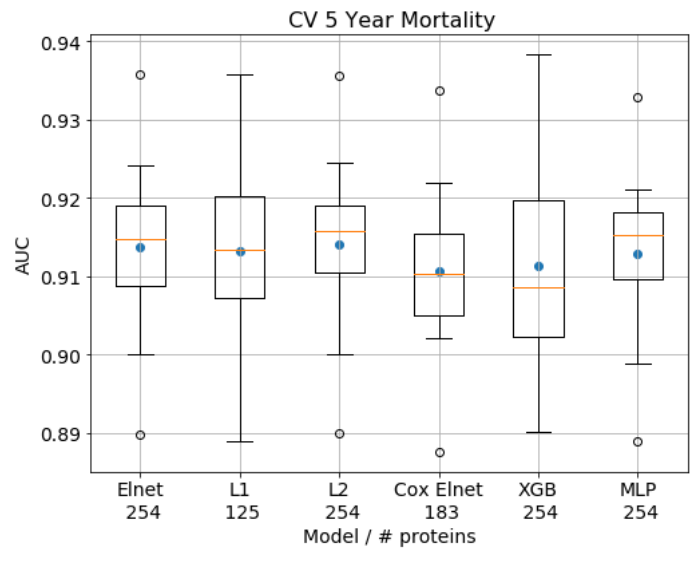

Supplementary Figure 18: Ten-fold CV of five-year mortality risk AUC for different protein models. The yellow centre line represents the median, the box limits represent the upper and lower quartiles, the whiskers represent the 1.5x interquartile range, the circles are data points outside the whisker range, and the blue dots represent the mean values.
